# Supplementary figures and images for: Stability and Antioxidant Activity of Hydro-Glyceric Extracts Obtained from Different Grape Seed Varieties Incorporated in Cosmetic Creams
Source: MDPI journal article supplement (doi:10.3390/antiox11071348), 2022-07-10

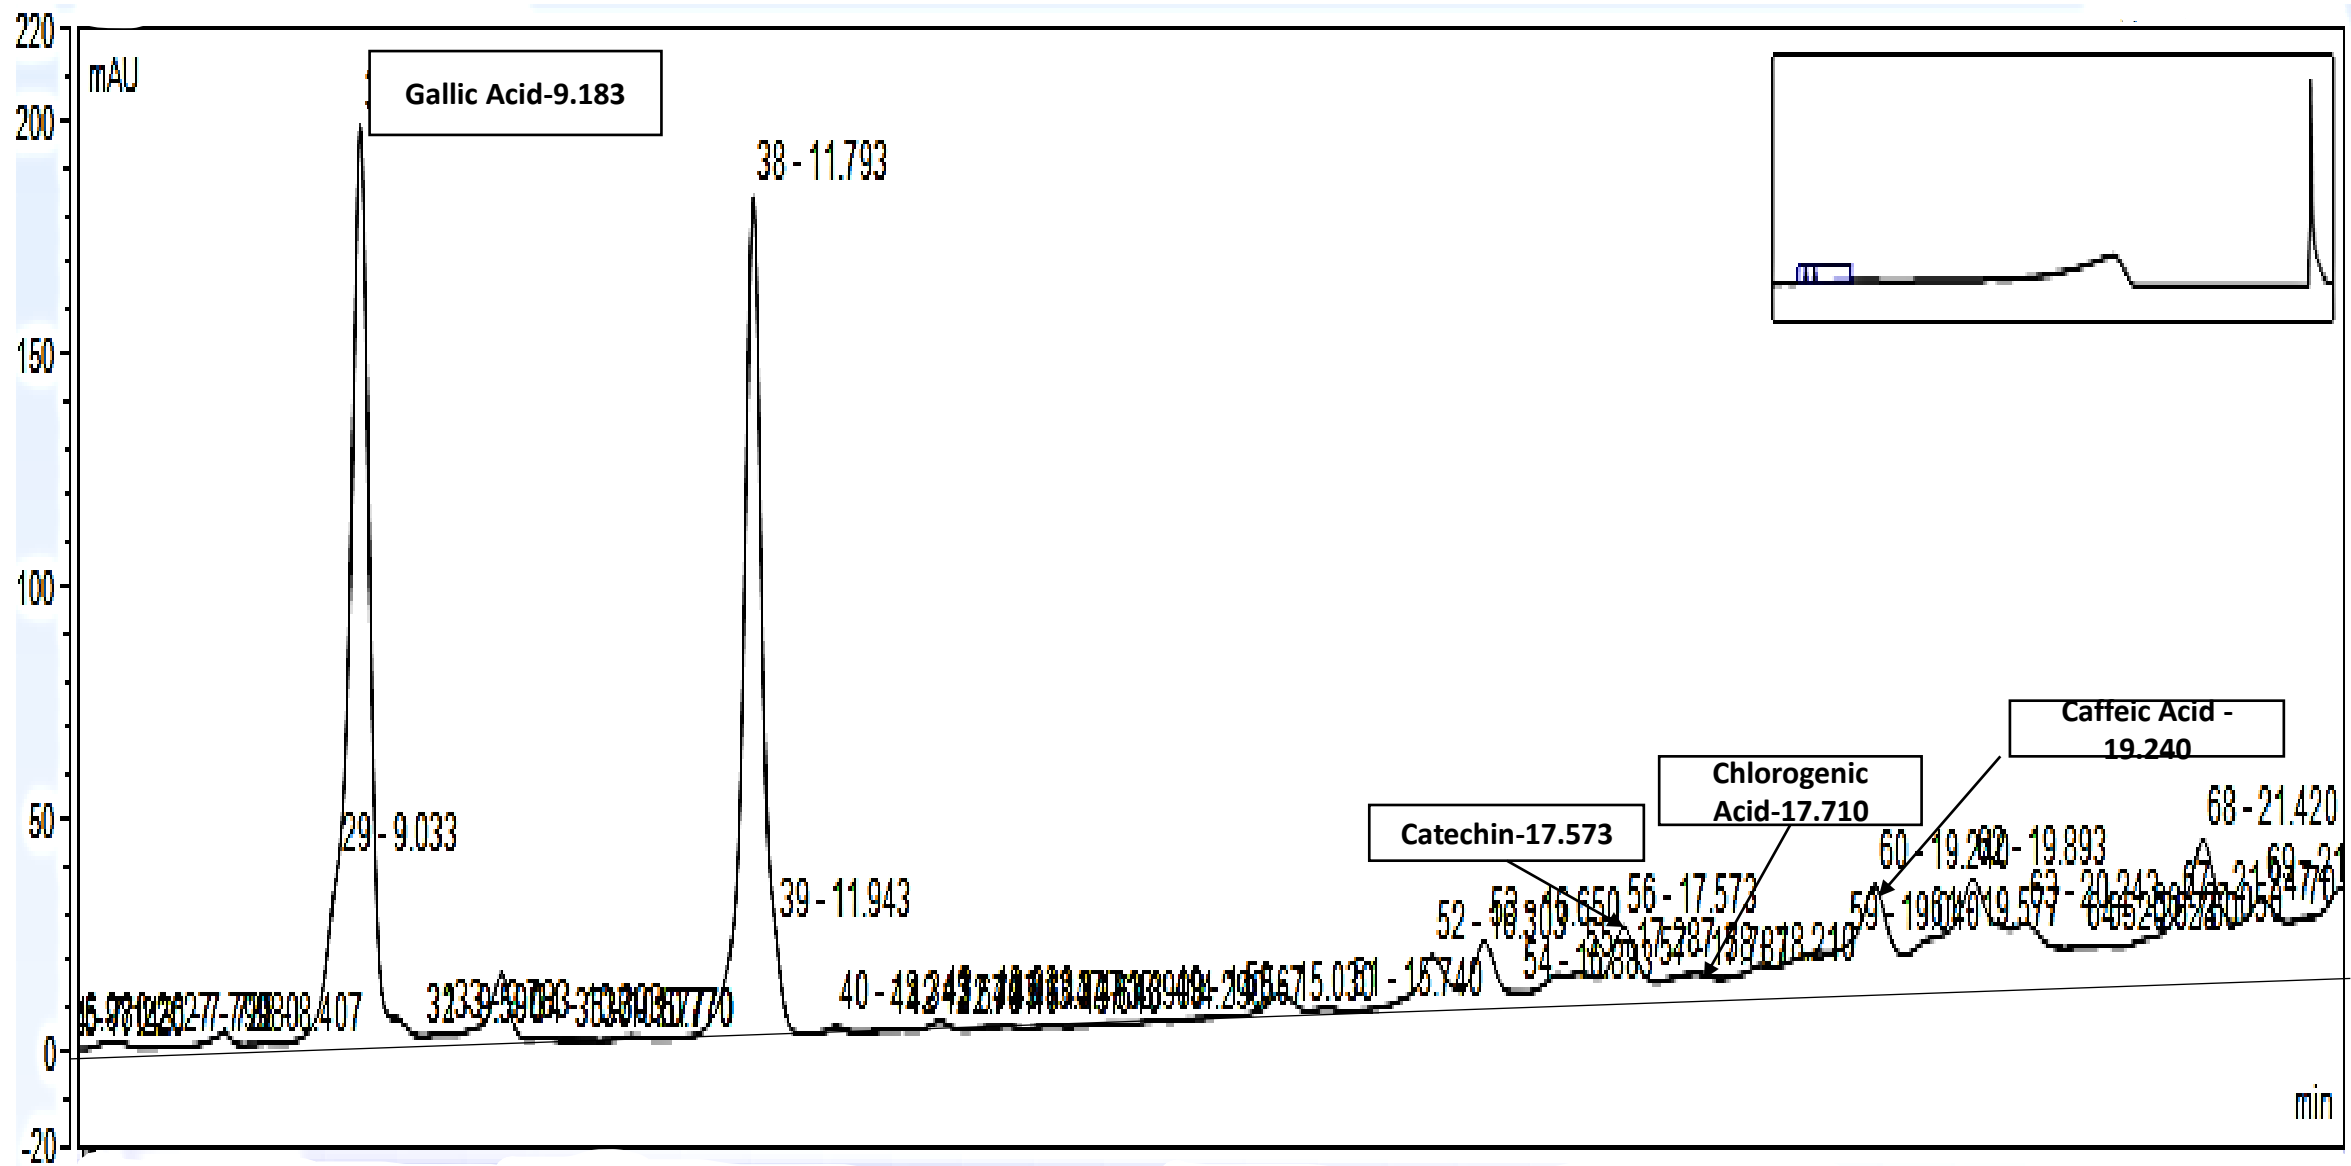

Figure S1 : Representative chromatogram of the performed HPLC analysis

Supplement: s1 [file s1]
